# Supplementary material for: Futibatinib, an Irreversible FGFR1–4 Inhibitor, in Patients with Advanced Solid Tumors Harboring FGF/FGFR Aberrations: A Phase I Dose-Expansion Study
Source: PubMed Central journal article supplement — Cancer Discov. 2021 Sep 22;12(2):402–15. doi: 10.1158/2159-8290.CD-21-0697 (PMC9762334; doi:10.1158/2159-8290.cd-21-0697), 2021-09-22

**Futibatinib, an irreversible FGFR1–4 inhibitor, in patients with advanced solid tumors harboring *FGF/FGFR* aberrations: a phase I dose-expansion study**

Funda Meric-Bernstam,<sup>1</sup> Rastislav Bahleda,<sup>2</sup> Cinta Hierro,<sup>3</sup> Marc Sanson,<sup>4</sup> John Bridgewater,<sup>5</sup> Hendrik-Tobias Arkenau,<sup>6</sup> Ben Tran,<sup>7</sup> Robin Kate Kelley,<sup>8</sup> Joon Oh Park,<sup>9</sup> Milind Javle,<sup>1</sup> Yaohua He,<sup>10</sup> Karim A. Benhadji,<sup>10</sup> Lipika Goyal<sup>11</sup>

<sup>1</sup>Department of Investigational Cancer Therapeutics, The University of Texas MD Anderson Cancer Center, Houston, TX, USA; <sup>2</sup>Early Drug Development Department (DITEP), Gustave Roussy Cancer Center, Villejuif, France; <sup>3</sup>Department of Medical Oncology; Vall d’Hebron University Hospital (HUVH) and Institute of Oncology (VHIO), Barcelona, Spain; <sup>4</sup>Sorbonne Université, Inserm, CNRS, UMR S 1127, Institut du Cerveau et de la Moelle Epinière, and AP-HP Hôpitaux Universitaires La Pitié Salpêtrière Charles Foix, Service de Neurologie 2 Mazarin, Paris, France; <sup>5</sup>UCL Cancer Institute, London, UK; <sup>6</sup>Sarah Cannon Research Institute, HCA Healthcare, London, UK; <sup>7</sup>Peter MacCallum Cancer Centre, Melbourne, Australia; <sup>8</sup>University of California, San Francisco, California, USA; <sup>9</sup>Samsung Medical Center, Sungkyunkwan University School of Medicine, Seoul, South Korea; <sup>10</sup>Taiho Oncology, Inc., Princeton, NJ, USA; <sup>11</sup>Massachusetts General Hospital Cancer Center, Boston, Massachusetts, USA

## Supplementary Methods

### Additional eligibility criteria

Patients aged 18 years or older with histologically or cytologically confirmed locally advanced or metastatic cancer and measurable disease per RECIST v1.1 or RANO criteria (for CNS tumors) were enrolled. Patients had to have adequate organ function, defined as aspartate aminotransferase (AST) and alanine aminotransferase (ALT)  $\leq 3 \times$  upper limit of normal (ULN) or ALT and AST  $\leq 5 \times$  ULN if there is underlying liver metastases, total bilirubin  $\leq 1.5 \times$  ULN, international normalized ratio  $< 1.3$ , absolute neutrophil count  $\geq 1000/\text{mm}^3$ , platelet count  $\geq 75,000/\text{mm}^3$ , hemoglobin  $\geq 9.0$  g/dL, phosphorus  $\leq$  ULN. In addition, patients had to have a creatinine clearance of  $\geq 40$  mL/min. Additional exclusion criteria were history or current evidence of clinically significant ectopic mineralization or calcification, clinically significant retinal disorder, evidence of serious uncontrolled ventricular arrhythmias, any major surgery, extended field radiotherapy locoregional therapy within 2–4 weeks of starting futibatinib, serious illness of medical conditions, or history of another primary malignancy.

### Additional statistical considerations

For primary CNS tumors with *FGFR* fusions or *FGFR1* activating mutations, sample size considerations were based on a multinomial 2-stage design, which would differentiate between poor activity (ORR  $\leq 10\%$  and early progression  $< 50\%$ ) and promising activity (ORR  $\geq 10\%$  and early progression  $\leq 30\%$ ) at an approximate 5% 1-sided significance level and 80% power. Fifteen tumor response-evaluable patients were planned to be enrolled at each of the 2 stages. For urothelial carcinoma with *FGFR3* gene fusions or *FGFR3*-activating mutations, approximately 28 patients were planned to be enrolled to reach a target of 25 tumor response-evaluable patients and sample size considerations were based on a minimax 2-stage design differentiating between a poor ORR of 10% vs a promising ORR of 30% at an approximate 5% 1-sided significance level and 80% power. Patients with *FGFR2*-amplified tumors were subdivided into subgroups of ovarian cancer, gastric/esophageal/gastroesophageal junction cancer, or other tumor types. The first 2 subgroups were enrolled based on a Simon's 2-stage design (differentiating between an ORR of 10% vs ORR of 30% at an approximate 10% 1-sided significance level and 80% power), and up to 20 patients were planned for enrollment into the 3rd subgroup. For tumor types with *FGFR* gene fusions or activating mutations, 15 patients were planned to be enrolled across the different tumor types with no single tumor type exceeding 10 patients.

**Supplementary Table S1. Baseline characteristics and prior therapy in patients receiving futibatinib 16 mg QD**

|                                        | <b>16-mg cohort<br/>(n = 27)</b> |
|----------------------------------------|----------------------------------|
| <b>Age, years</b>                      |                                  |
| Median (range)                         | 56.0 (34–74)                     |
| <b>Sex, n (%)</b>                      |                                  |
| Female                                 | 21 (77.8)                        |
| Male                                   | 6 (22.2)                         |
| <b>Race, n (%)</b>                     |                                  |
| White                                  | 23 (85.2)                        |
| Black or African American              | 1 (3.7)                          |
| Asian                                  | 1 (3.7)                          |
| Unknown                                | 2 (7.4)                          |
| <b>ECOG PS, n (%)</b>                  |                                  |
| 0                                      | 13 (48.1)                        |
| 1                                      | 14 (51.9)                        |
| <b>FGF/FGFR alteration, n (%)</b>      |                                  |
| FGFR1 amplification                    | 1 (3.7)                          |
| FGFR2 fusions/rearrangement            | 17 (63.0)                        |
| FGFR2 mutation                         | 3 (11.1)                         |
| FGFR2 amplification                    | 4 (14.8)                         |
| FGFR3 fusions/rearrangement            | 3 (11.1)                         |
| FGFR3 mutation                         | 2 (7.4)                          |
| FGFR3 amplification                    | 1 (3.7)                          |
| <b>Cancer type, n (%)</b>              |                                  |
| Cholangiocarcinoma                     | 19 (70.4)                        |
| Intrahepatic                           | 19 (70.4)                        |
| Extrahepatic                           | 0                                |
| Breast                                 | 1 (3.7)                          |
| Primary CNS                            | 1 (3.7)                          |
| Urothelial carcinoma                   | 1 (3.7)                          |
| Sarcoma                                | 1 (3.7)                          |
| Gall bladder                           | 1 (3.7)                          |
| Thyroid                                | 1 (3.7)                          |
| Primary unknown                        | 2 (7.4)                          |
| <b>Number of prior regimens, n (%)</b> |                                  |
| 1                                      | 11 (40.7)                        |
| 2                                      | 3 (11.1)                         |
| 3                                      | 4 (14.8)                         |
| 4                                      | 5 (18.5)                         |
| ≥5                                     | 3 (11.1)                         |
| <b>Type of prior therapy, n (%)</b>    |                                  |
| Chemotherapy                           | 9 (33.3)                         |
| FGFR inhibitor                         | 7 (25.9)                         |

Abbreviations: CNS, central nervous system; ECOG PS, Eastern Cooperative Oncology Group performance status; FGF, fibroblast growth factor; FGFR, fibroblast growth factor receptor; QD, once daily; SD, standard deviation.

**Supplementary Table S2. Characteristics of patients with confirmed partial responses per investigator review**

| <b>Patient</b> | <b>Dose received</b> | <b>Cancer type</b>             | <b>Prior FGFRi</b> | <b>FGFR alteration</b>                                         | <b>PFS, months</b> | <b>Duration of response, months</b> |
|----------------|----------------------|--------------------------------|--------------------|----------------------------------------------------------------|--------------------|-------------------------------------|
| 1              | 20 mg                | Extrahepatic CCA               | No                 | <i>FGFR2-POC1B</i> fusion                                      | 4.8                | 3.5                                 |
| 2              | 20 mg                | Intrahepatic CCA               | No                 | <i>FGFR2-DBP</i> fusion                                        | 10.9               | 9.6                                 |
| 3              | 20 mg                | Intrahepatic CCA               | Yes                | <i>FGFR2-BICC1</i> fusion                                      | 15.9               | 7.6                                 |
| 4              | 20 mg                | Intrahepatic CCA               | No                 | <i>FGFR2-BICC1</i> fusion                                      | 4.4                | 1.9 <sup>a</sup>                    |
| 5              | 20 mg                | Intrahepatic CCA               | No                 | <i>FGFR2-FILIP1</i> fusion                                     | 4.8                | 2.0 <sup>a</sup>                    |
| 6              | 20 mg                | Intrahepatic CCA               | No                 | <i>FGFR2</i> p.C383R mutation                                  | 9.2                | 6.5 <sup>a</sup>                    |
| 7              | 20 mg                | Intrahepatic CCA               | No                 | <i>FGFR2</i> rearrangement                                     | 9.5                | 4.0 <sup>a</sup>                    |
| 8              | 20 mg                | Intrahepatic CCA               | Yes                | <i>FGFR2</i> p.W290C mutation                                  | 8.9                | 4.1 <sup>a</sup>                    |
| 9              | 20 mg                | Intrahepatic CCA               | No                 | <i>FGFR2-BICC1</i> fusion                                      | 12.7               | 9.9                                 |
| 10             | 20 mg                | Intrahepatic CCA               | No                 | <i>FGFR2</i> rearrangement                                     | 9.0                | 6.9                                 |
| 11             | 20 mg                | Primary CNS tumor/glioblastoma | No                 | <i>FGFR1-TACC1</i> fusion                                      | 7.0                | 5.8                                 |
| 12             | 20 mg                | Urothelial carcinoma           | No                 | <i>FGFR3</i> p.S249C mutation                                  | 2.7                | 1.4 <sup>a</sup>                    |
| 13             | 20 mg                | Urothelial carcinoma           | No                 | <i>FGFR3</i> p.S249C mutation                                  | 4.7                | 3.4                                 |
| 14             | 20 mg                | Urothelial carcinoma           | No                 | <i>FGFR1</i> p.M563T mutation, <i>FGF3/FGF19</i> amplification | 6.8                | 5.6                                 |
| 15             | 20 mg                | Gastric cancer/adenocarcinoma  | No                 | <i>FGFR2</i> amplification                                     | 4.8                | 3.5                                 |
| 16             | 20 mg                | Gastric cancer/adenocarcinoma  | No                 | <i>FGFR3-TACC3</i> fusion                                      | 6.7                | 5.4 <sup>a</sup>                    |
| 17             | 20 mg                | Head and neck cancer           | No                 | <i>FGFR1-PLAG1</i> fusion                                      | 6.9                | 5.6 <sup>a</sup>                    |
| 18             | 20 mg                | Primary unknown                | No                 | <i>FGFR2</i> p.Y375C mutation                                  | 19.2               | 10.3 <sup>a</sup>                   |
| 19             | 16 mg                | Intrahepatic CCA               | Yes                | <i>FGFR2-NRAP</i> fusion                                       | 21.7               | 20.4                                |

| Patient | Dose received | Cancer type        | Prior FGFRi | FGFR alteration                                        | PFS, months | Duration of response, months |
|---------|---------------|--------------------|-------------|--------------------------------------------------------|-------------|------------------------------|
| 20      | 16 mg         | Intrahepatic CCA   | No          | <i>FGFR2</i> rearrangement                             | 7.1         | 6.0                          |
| 21      | 16 mg         | Intrahepatic CCA   | Yes         | <i>FGFR2</i> amplification/ <i>FGFR2</i> rearrangement | 4.8         | 3.5 <sup>a</sup>             |
| 22      | 16 mg         | Intrahepatic CCA   | No          | <i>FGFR2-WAC</i> rearrangement                         | 6.9         | 4.2                          |
| 23      | 16 mg         | Intrahepatic CCA   | No          | <i>FGFR2-TNS1</i> fusion                               | 11.0        | 9.7                          |
| 24      | 16 mg         | Intrahepatic CCA   | No          | <i>FGFR2-TTC28</i> fusion                              | 24.1        | 12.7 <sup>a</sup>            |
| 25      | 16 mg         | Intrahepatic CCA   | Yes         | <i>FGFR2-CCDC6</i> fusion                              | 6.8         | 8.8 <sup>a</sup>             |
| 26      | 16 mg         | Intrahepatic CCA   | No          | <i>FGFR2-KIAA1217</i> fusion                           | 6.8         | 5.6                          |
| 27      | 16 mg         | Breast cancer/TNBC | No          | <i>FGFR2</i> amplification                             | 22.1        | 20.8 <sup>a</sup>            |

Abbreviations: CCA, cholangiocarcinoma; CNS, central nervous system; FGF, fibroblast growth factor; FGFR, fibroblast growth factor receptor; FGFRi, FGFR inhibitor; PFS, progression-free survival; TNBC, triple-negative breast cancer.

<sup>a</sup>Response was ongoing at the time of data cutoff.

**Supplementary Table S3. Treatment response by tumor type and *FGFR* aberration among patients who received futibatinib 20 mg QD<sup>a</sup>**

| Category                                                  | Objective response<br><i>n/N</i> (%) | Stable disease<br><i>n/N</i> (%) | Disease control<br><i>n/N</i> (%) |
|-----------------------------------------------------------|--------------------------------------|----------------------------------|-----------------------------------|
| <b>By tumor type</b>                                      |                                      |                                  |                                   |
| Cholangiocarcinoma                                        | 10/64 (15.6)                         | 36/64 (56.3)                     | 46/64 (71.9)                      |
| Primary CNS tumor                                         | 1/36 (2.8)                           | 6/36 (16.7)                      | 7/36 (19.4)                       |
| Urothelial cancer                                         | 3/19 (15.8)                          | 6/19 (31.6)                      | 9/19 (47.4)                       |
| Breast cancer                                             | 0/11 (0)                             | 3/11 (27.3)                      | 3/11 (27.3)                       |
| Gastric cancer                                            | 2/9 (22.2)                           | 3/9 (33.3)                       | 5/9 (55.6)                        |
| Other tumor types                                         | 2/31 (6.5)                           | 11/31 (35.5)                     | 13/31 (41.9)                      |
| <b>By specific <i>FGF/FGFR</i> aberration<sup>b</sup></b> |                                      |                                  |                                   |
| <i>FGFR1</i> mutation                                     | 1/10 (10.0)                          | 3/10 (30.0)                      | 4/10 (40.0)                       |
| <i>FGFR2</i> fusion/rearrangement                         | 8/48 (16.7)                          | 29/48 (60.4)                     | 37/48 (77.1)                      |
| <i>FGFR2</i> mutation                                     | 3/23 (13.0)                          | 12/23 (52.2)                     | 15/23 (65.2)                      |
| <i>FGFR2</i> amplification                                | 1/21 (4.8)                           | 6/21 (28.6)                      | 7/21 (33.3)                       |
| <i>FGFR3</i> fusion/rearrangement                         | 1/32 (3.1)                           | 6/32 (18.8)                      | 7/32 (21.9)                       |
| <i>FGFR3</i> mutation                                     | 2/15 (13.3)                          | 3/15 (20.0)                      | 5/15 (33.3)                       |
| <i>FGF</i> amplification                                  | 1/23 (4.3)                           | 8/23 (34.8)                      | 9/23 (39.1)                       |
| <b>By <i>FGFR</i> isoform<sup>c</sup></b>                 |                                      |                                  |                                   |
| <i>FGFR1</i>                                              | 3/17 (17.6)                          | 3/17 (17.6)                      | 6/17 (35.3)                       |
| <i>FGFR2</i>                                              | 12/88 (13.6)                         | 45/88 (51.1)                     | 57/88 (64.8)                      |
| <i>FGFR3</i>                                              | 3/47 (6.4)                           | 9/47 (19.1)                      | 12/47 (25.5)                      |
| <b>By type of <i>FGFR</i> aberration</b>                  |                                      |                                  |                                   |
| Fusion/rearrangement                                      | 11/85 (12.9)                         | 35/85 (41.2)                     | 46/85 (54.1)                      |
| Mutation                                                  | 6/51 (11.8)                          | 19/51 (37.3)                     | 25/51 (49.0)                      |
| Amplification                                             | 1/24 (4.2)                           | 6/24 (25.0)                      | 7/24 (29.2)                       |

Abbreviations: CNS, central nervous system; FGF, fibroblast growth factor; FGFR, FGF receptor; RANO, Response Assessment in Neuro-oncology; RECIST v1.1, Response Evaluation Criteria in Solid Tumors version 1.1; QD, once daily.

<sup>a</sup>Table shows investigator-assessed response per RANO (for CNS tumors) or RECIST v1.1 (all other tumor types); only categories with  $\geq 9$  patients are included.

<sup>b</sup>Patients who had  $>1$  type of *FGFR* aberration are represented in each relevant category.

<sup>c</sup>Three patients had *FGFR4* mutations, of whom 1 patient had stable disease and 2 patients had disease progression.

**Supplementary Table S4. TRAEs in patients receiving futibatinib 20 mg QD**

|                                   | 20-mg cohort (N = 170) |           |           |           |         |         |
|-----------------------------------|------------------------|-----------|-----------|-----------|---------|---------|
|                                   | n (%)                  |           |           |           |         |         |
|                                   | Any grade              | Grade 1   | Grade 2   | Grade 3   | Grade 4 | Grade 5 |
| <b>Any TRAE</b>                   | 162 (95.3)             | 27 (15.9) | 62 (36.5) | 72 (42.4) | 1 (0.6) | 0       |
| Any serious TRAE                  | 11 (6.5)               | 0         | 3 (1.8)   | 8 (4.7)   | 0       | 0       |
| Action taken because of TRAE      |                        |           |           |           |         |         |
| Dosing modification               | 75 (44.1)              | 2 (1.2)   | 13 (7.6)  | 60 (35.3) | 0       | 0       |
| Treatment discontinuation         | 6 (3.5)                | 0         | 3 (1.8)   | 3 (1.8)   | 0       | 0       |
| <b>TRAEs in ≥10% of patients</b>  |                        |           |           |           |         |         |
| Hyperphosphatemia                 | 137 (80.6)             | 26 (15.3) | 73 (42.9) | 38 (22.4) | 0       | 0       |
| Diarrhea                          | 41 (24.1)              | 29 (17.1) | 11 (6.5)  | 1 (0.6)   | 0       | 0       |
| ALT increased                     | 35 (20.6)              | 13 (7.6)  | 8 (4.7)   | 14 (8.2)  | 0       | 0       |
| Alopecia                          | 32 (18.8)              | 26 (15.3) | 6 (3.5)   | 0         | 0       | 0       |
| AST increased                     | 32 (18.8)              | 14 (8.2)  | 11 (6.5)  | 7 (4.1)   | 0       | 0       |
| Fatigue                           | 26 (15.3)              | 12 (7.1)  | 11 (6.5)  | 3 (1.8)   | 0       | 0       |
| Nausea                            | 25 (14.7)              | 20 (11.8) | 5 (2.9)   | 0         | 0       | 0       |
| Dry mouth                         | 22 (12.9)              | 18 (10.6) | 4 (2.4)   | 0         | 0       | 0       |
| Dry skin                          | 22 (12.9)              | 21 (12.4) | 1 (0.6)   | 0         | 0       | 0       |
| Stomatitis                        | 22 (12.9)              | 9 (5.3)   | 8 (4.7)   | 5 (2.9)   | 0       | 0       |
| Palmar–plantar erythrodysesthesia | 21 (12.4)              | 10 (5.9)  | 5 (2.9)   | 6 (3.5)   | 0       | 0       |
| Decreased appetite                | 18 (10.6)              | 11 (6.5)  | 7 (4.1)   | 0         | 0       | 0       |
| Asthenia                          | 17 (10.0)              | 8 (4.7)   | 6 (3.5)   | 3 (1.8)   | 0       | 0       |
| Constipation                      | 17 (10.0)              | 14 (8.2)  | 3 (1.8)   | 0         | 0       | 0       |

Abbreviations: ALT, alanine transaminase; AST, aspartate transaminase; QD, once daily; TRAE, treatment-related adverse event.

**Supplementary Table S5. TEAEs of special interest in ≥5% of patients receiving futibatinib 20 mg QD**

|                                                                       | 20-mg cohort (N= 170)        |                |                |                |                |
|-----------------------------------------------------------------------|------------------------------|----------------|----------------|----------------|----------------|
|                                                                       | n (%)                        |                |                |                |                |
| <b>Any TEAE of special interest</b>                                   | <b>Any grade<sup>a</sup></b> | <b>Grade 1</b> | <b>Grade 2</b> | <b>Grade 3</b> | <b>Grade 4</b> |
| <b>Any TEAE of special interest</b>                                   | 145 (85.3)                   | 27 (15.9)      | 77 (45.3)      | 40 (23.5)      | 1 (0.6)        |
| Hyperphosphatemia (including increased blood phosphorus) <sup>b</sup> | 141 (82.9)                   | 24 (14.1)      | 77 (45.3)      | 40 (23.5)      | 0              |
| Hyperphosphatemia                                                     | 138 (81.2)                   | 26 (15.3)      | 74 (43.5)      | 38 (22.4)      | 0              |
| Eye disorders <sup>b,c</sup>                                          | 44 (25.9)                    | 35 (20.6)      | 7 (4.1)        | 1 (0.6)        | 1 (0.6)        |
| Dry eye                                                               | 16 (9.4)                     | 16 (9.4)       | 0 (0)          | 0              | 0              |
| Vision blurred                                                        | 11 (6.5)                     | 11 (6.5)       | 0 (0)          | 0              | 0              |
| Nail toxicities <sup>b</sup>                                          | 34 (20.0)                    | 23 (13.5)      | 10 (5.9)       | 1 (0.6)        | 0              |
| Onycholysis                                                           | 10 (5.9)                     | 8 (4.7)        | 2 (1.2)        | 0              | 0              |
| Nail disorder                                                         | 9 (5.3)                      | 6 (3.5)        | 3 (1.8)        | 0              | 0              |
| Paronychia                                                            | 6 (3.5)                      | 3 (1.8)        | 3 (1.8)        | 0              | 0              |
| Central serous retinopathy <sup>b</sup>                               | 7 (4.1)                      | 4 (2.4)        | 3 (1.8)        | 0              | 0              |

Abbreviations: QD, once daily; TEAE, treatment-emergent adverse event.

<sup>a</sup>No grade 5 toxicities were reported. <sup>b</sup>Group terms. <sup>c</sup>Other than central serous retinopathy.



**Supplementary Table S6. AEs in patients receiving futibatinib 16 mg QD**

|                                   | 16-mg cohort ( <i>n</i> = 27) |           |
|-----------------------------------|-------------------------------|-----------|
|                                   | <i>n</i> (%)                  |           |
|                                   | Any grade                     | Grade ≥3  |
| Any TEAE                          | 27 (100.0)                    | 13 (48.1) |
| Any treatment-related AE          | 27 (100.0)                    | 8 (29.6)  |
| Any serious TEAE                  | 4 (14.8)                      | 1 (3.7)   |
| Action taken because of TEAE      |                               |           |
| Dosing modification               | 14 (51.9)                     | 7 (25.9)  |
| Treatment discontinuation         | 1 (3.7)                       | 0         |
| <b>TEAEs in ≥20% of patients</b>  |                               |           |
| Hyperphosphatemia                 | 22 (81.5)                     | 4 (14.8)  |
| Nausea                            | 12 (44.4)                     | 0         |
| Diarrhea                          | 10 (37.0)                     | 0         |
| Constipation                      | 9 (33.3)                      | 0         |
| ALT increased                     | 8 (29.6)                      | 1 (3.7)   |
| Stomatitis                        | 8 (29.6)                      | 0         |
| Dry mouth                         | 7 (25.9)                      | 0         |
| Dry skin                          | 7 (25.9)                      | 0         |
| Palmar–plantar erythrodysesthesia | 7 (25.9)                      | 1 (3.7)   |
| AST increased                     | 7 (25.9)                      | 1 (3.7)   |
| Fatigue                           | 6 (22.2)                      | 0         |

Abbreviations: AE, adverse event; ALT, alanine transaminase; AST, aspartate transaminase; QD, once daily; TEAE, treatment-emergent AE.

**Supplementary Figure S1. Individual response and treatment outcome by tumor type in patients who received futibatinib 16 mg QD**

The figure shows individual treatment outcomes organized by color coded tumor type in 27 patients who received futibatinib 16 mg QD. *FGFR* aberrations are indicated in the grid below the waterfall plot; in some cases, patients had >1 type of *FGFR* aberration, as indicated. CCA, cholangiocarcinoma; CNS, central nervous system; *FGFR*, fibroblast growth factor receptor; *FGFRi*, *FGFR* inhibitor; NE, not evaluable; PD, progressive disease; PFS, progression-free survival; PR, partial response; QD, once daily; SD, stable disease.

Supplementary Figure S1

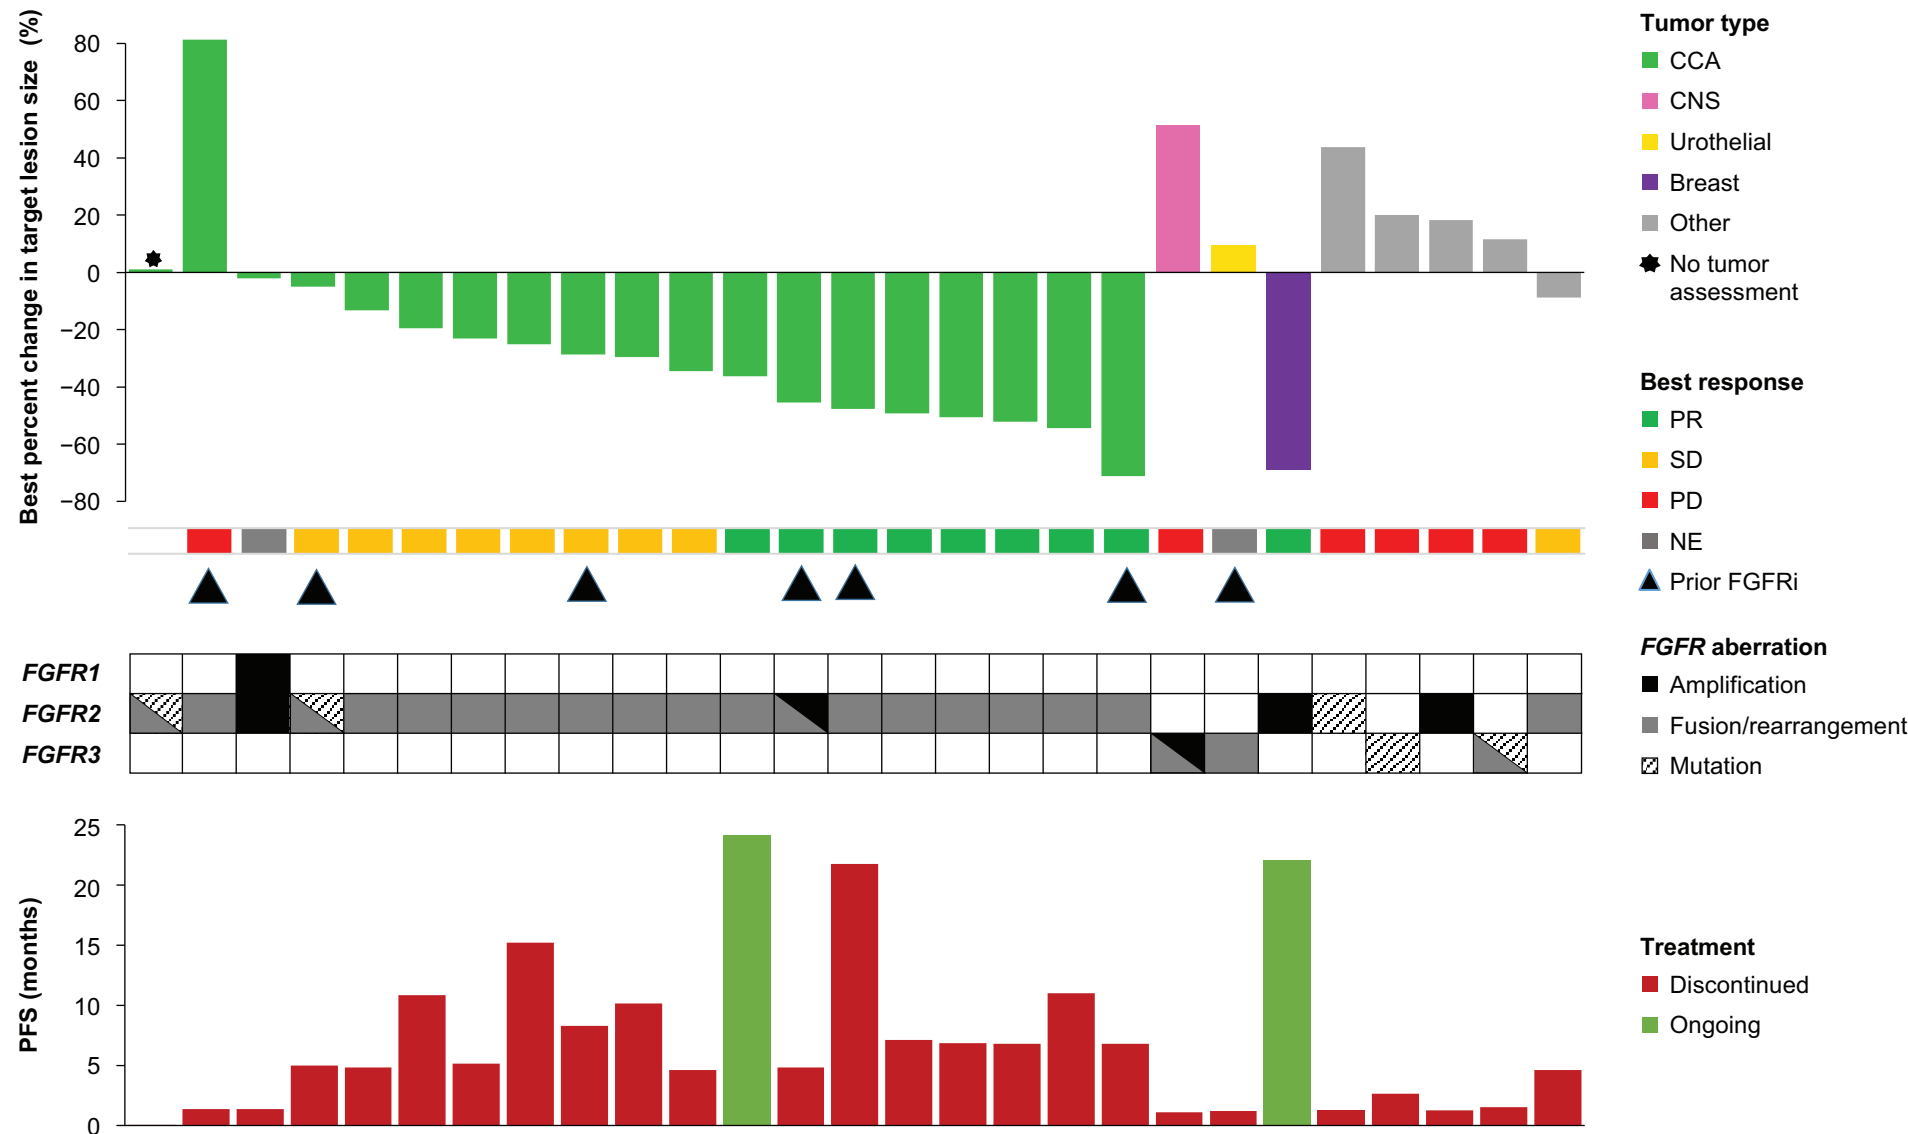

Supplement: cd-21-0697_supplementary_methods_tables_and_figure_suppsm1.pdf [file cd-21-0697_supplementary_methods_tables_and_figure_suppsm1.pdf]
